# Supplementary material for: Internal-strain-controlled tungsten bronze structural ceramics for 5G millimeter-wave metamaterials
Source: Royal Society of Chemistry journal article supplement (doi:10.1039/d1tc03304b), 2021-01-01
Supplement: d1tc03304b1.pdf [file d1tc03304b1.pdf]

## Supplementary materials

The Raman spectroscopy was used to analyze the relationship between dielectric properties and crystal structure of BNT-AGx ceramics in this work. As shown in Table S1, for all 8d and 4c wyckoff positions with one 4a position, BNT-AGx structure belonged to the space group Pbnm and had 8 types vibration modes in lattice:  $A_g$ ,  $A_u$ ,  $B_{1g}$ ,  $B_{1u}$ ,  $B_{2g}$ ,  $B_{2u}$ ,  $B_{3g}$  and  $B_{3u}$  based on the group theory and  $D_{2h}$  point group. The irreducible representations for the structure were obtained by the following equation<sup>[1]</sup>:

$$n_m = \frac{1}{h} \sum_R \chi(R) U(R) (\pm 1 + 2\cos\theta_R)$$

Here,  $n_m$  was the number of vibrational modes with a symmetry presented by the  $m$ th irreducible representation, the  $h=8$  was derived from the order of vector group that made up of all symmetry elements  $R$ ,  $\chi(R)$  was the reducible representation of  $R$ ,  $U(R)$  was the number of atoms under the symmetry operations of space group, and  $(\pm 1 + 2\cos\theta_R)$  was the trace of the matrix  $R$ .

Table 1 Data used for irreducible representation analysis

| $D_{2h}$                | R   |         |         |         |    |               |               |               | Functions       | Number of vibration modes |
|-------------------------|-----|---------|---------|---------|----|---------------|---------------|---------------|-----------------|---------------------------|
|                         | E   | $C_2^z$ | $C_2^y$ | $C_2^x$ | I  | $\sigma_{xy}$ | $\sigma_{xz}$ | $\sigma_{yz}$ |                 |                           |
| $A_g$                   | 1   | 1       | 1       | 1       | 1  | 1             | 1             | 1             | $x^2, y^2, z^2$ | 71                        |
| $B_{1g}$                | 1   | 1       | -1      | -1      | 1  | 1             | -1            | -1            | $xy, J_z$       | 55                        |
| $B_{2g}$                | 1   | -1      | 1       | -1      | 1  | -1            | 1             | -1            | $xz, J_y$       | 71                        |
| $B_{3g}$                | 1   | -1      | -1      | 1       | 1  | -1            | -1            | 1             | $yz, J_x$       | 55                        |
| $A_u$                   | 1   | 1       | 1       | 1       | -1 | -1            | -1            | -1            | -               | 58                        |
| $B_{1u}$                | 1   | 1       | -1      | -1      | -1 | -1            | 1             | 1             | $z$             | 74                        |
| $B_{2u}$                | 1   | -1      | 1       | -1      | -1 | 1             | -1            | 1             | $y$             | 58                        |
| $B_{3u}$                | 1   | -1      | -1      | 1       | -1 | 1             | 1             | -1            | $x$             | 74                        |
| U(R)                    | 172 | 0       | 0       | 0       | 4  | 64            | 0             | 0             |                 |                           |
| $\pm 1 + 2\cos\theta_R$ | 3   | -1      | -1      | -1      | -3 | 1             | 1             | 1             |                 |                           |

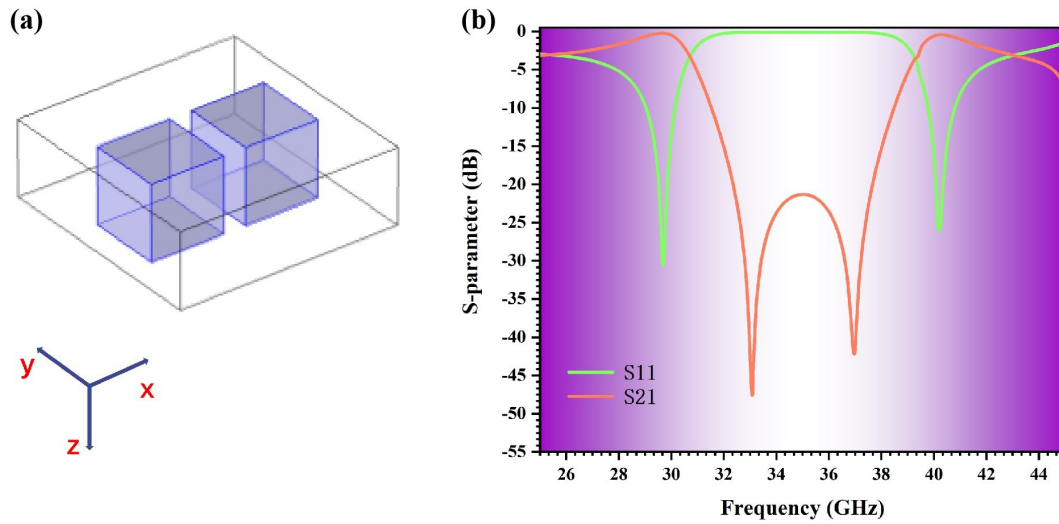

Fig. S1 Simulated results of (a) the BNT-AGx reflective filter unit cell structure and (b) the S-parameter.

Here, we utilized a dimer structure ( $1 \times 1 \times 1 \text{ mm}^3$ , in Fig. S1(a)) embedded in FR4 ( $p=3 \text{ mm}$ , the distance between two blocks was  $1 \text{ mm}$ ) to achieve the mode coupling between BNT-AGx blocks, forming a broadband reflective filter. The transmission stop-band was about  $7 \text{ GHz}$  (@  $10 \text{ dB}$ ) with low insertion loss about  $0.5 \text{ dB}$ , as shown in Fig. S1(b).

## Reference

- [1] S. R. Zhang, Z. X. Fang, Z. Xiong, B. Tang, C. T. Yang, *J. Alloys Compd.* **2017**, 723, 580.
